# Supplementary material
Source: publisher site journal article supplement (https://www.dovepress.com/get_supplementary_file.php?f=353362.docx)
Supplement: Supplementary file 1 [file get_supplementary_file.php]

*Supplemental Figures*


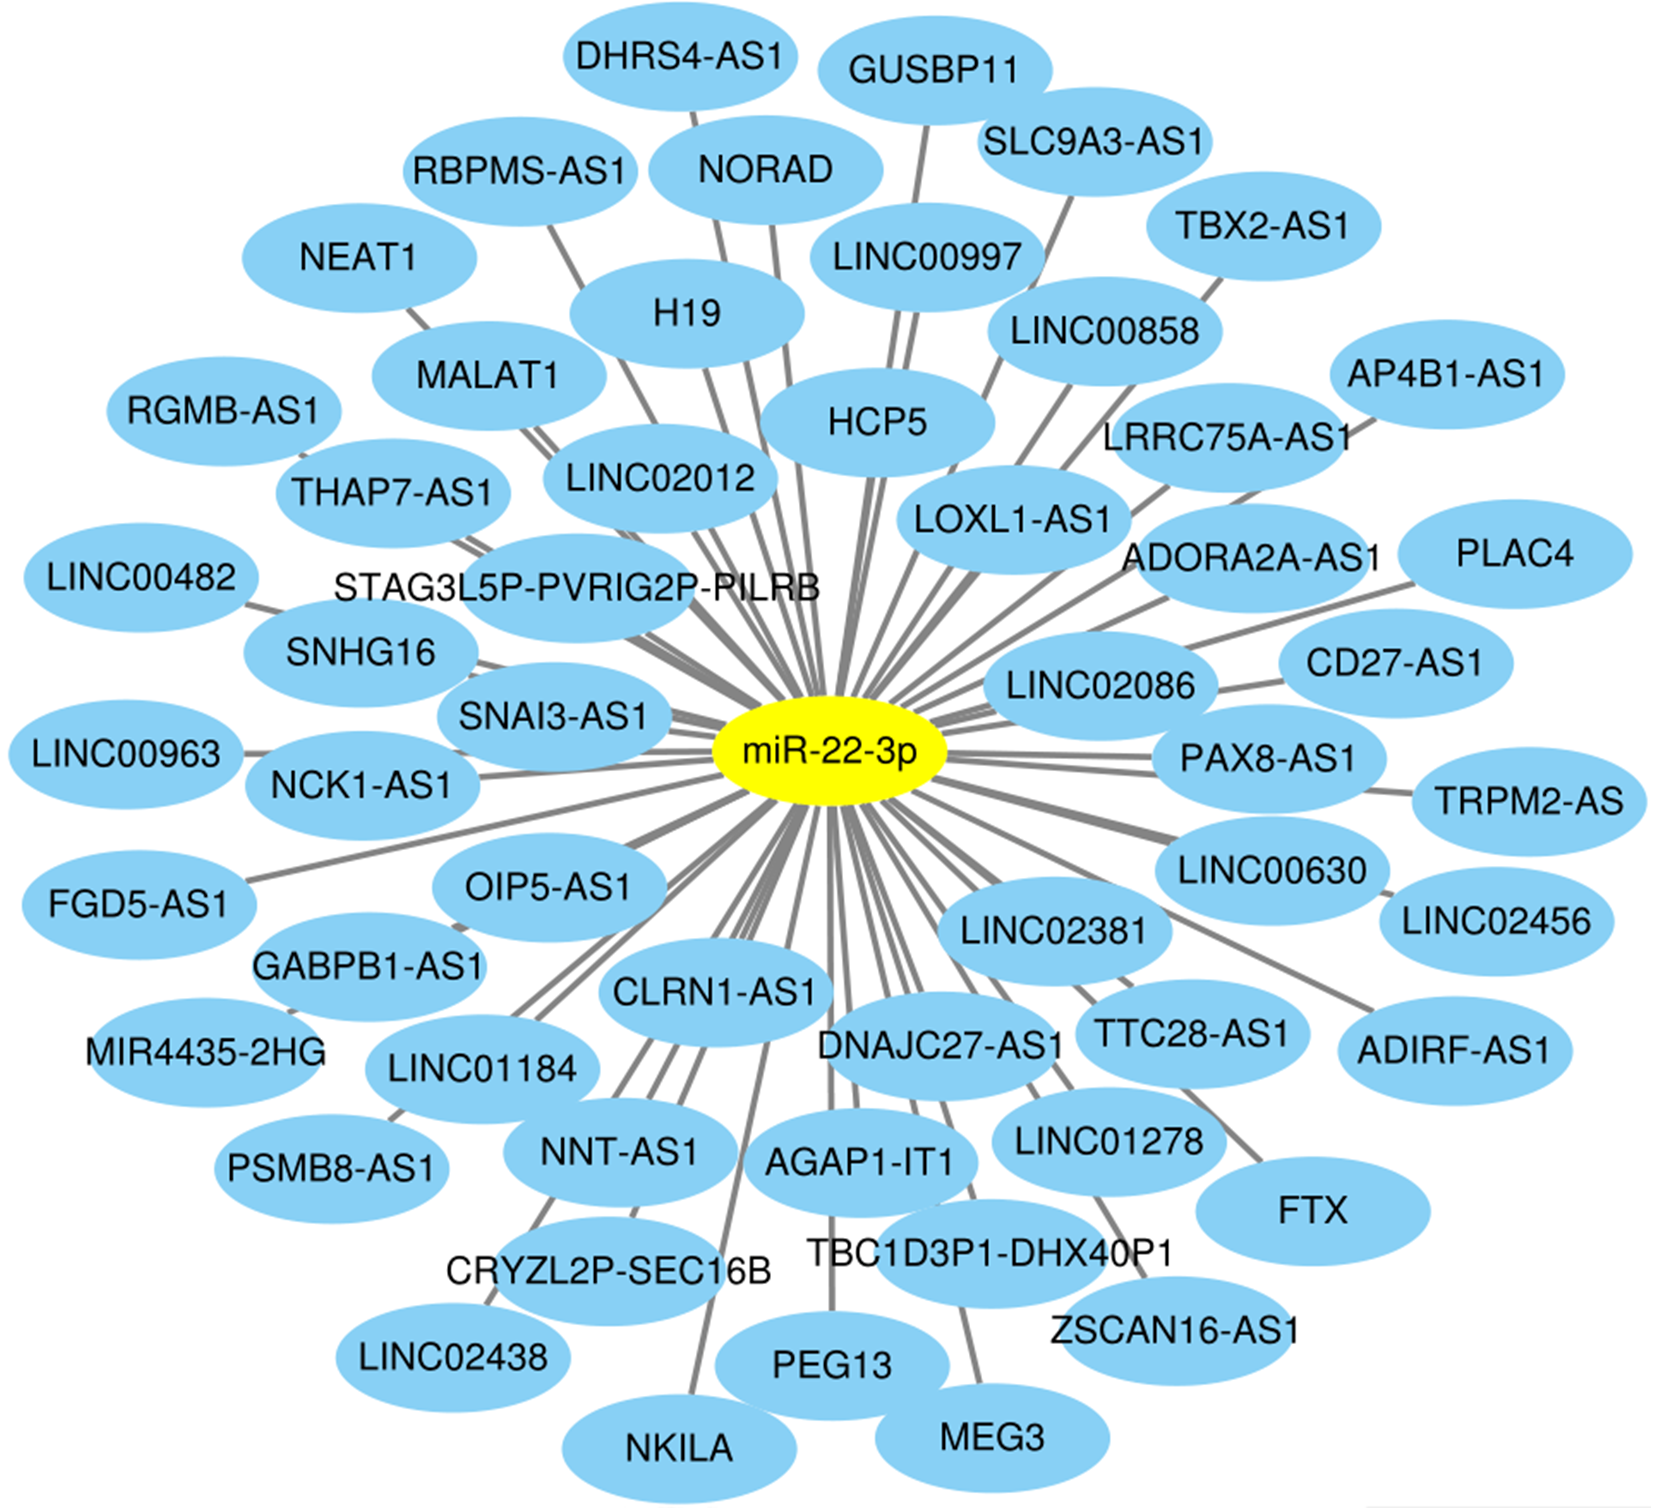


Figure S1. The lncRNAs - miR-22-3p prediction network produced by Cytoscape


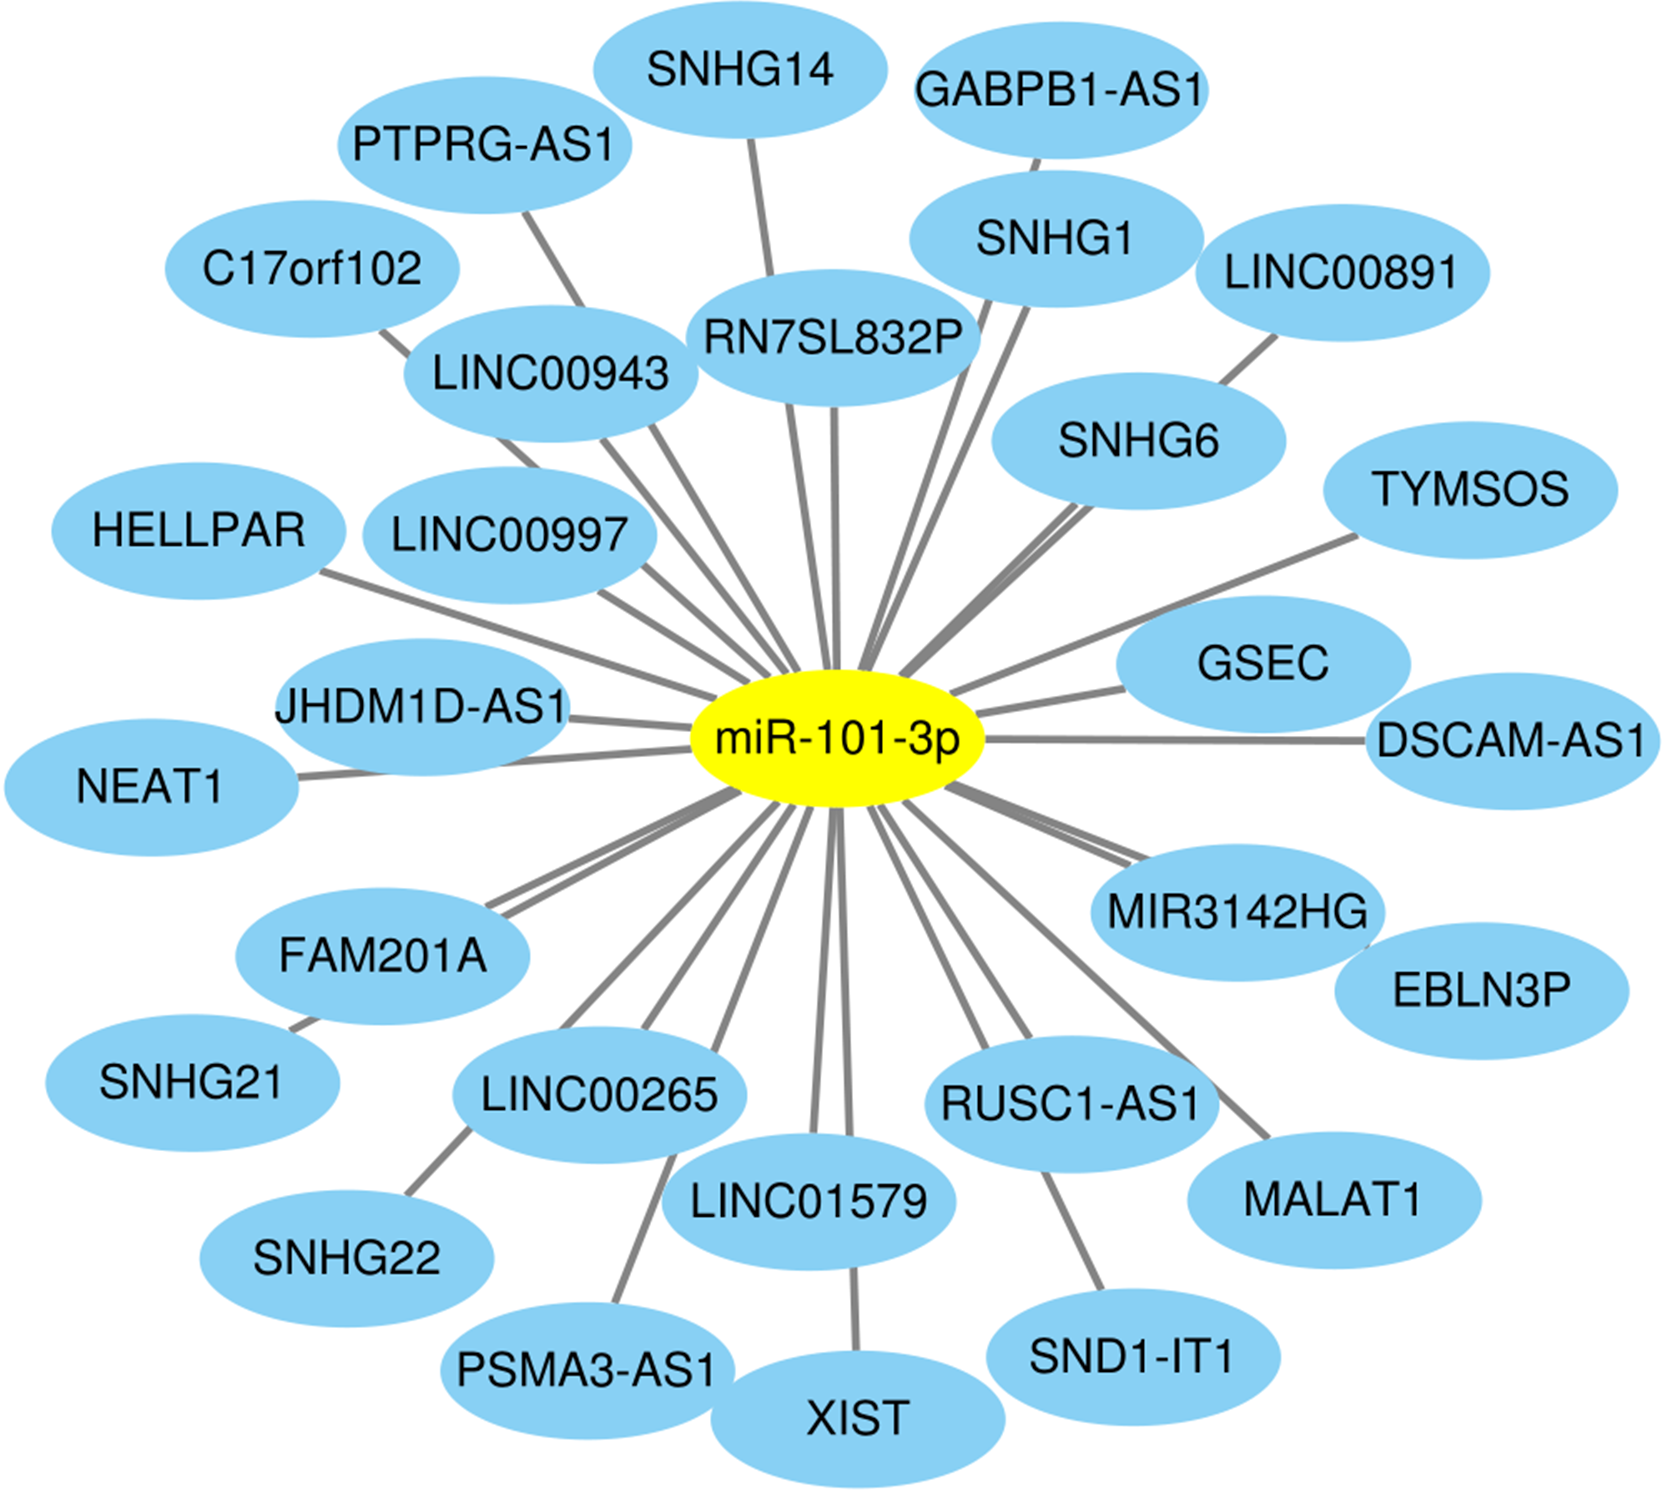


Figure S2. The lncRNAs - miR-101-3p prediction network produced by Cytoscape
